# Supplementary material for: The Changes of Trends in the Diagnosis and Treatment of Diabetic Foot Ulcer over a 10-Year Period: Single Center Study
Source: PubMed Central journal article supplement — Diabetes Metab J. 2018 Apr 27;42(4):308–19. doi: 10.4093/dmj.2017.0076 (PMC6107356; doi:10.4093/dmj.2017.0076), 2018-04-27
Supplement: dmj-42-308-s001.pdf [file dmj-42-308-s001.pdf]

**Supplementary Table 1.** Degree of diabetic foot ulcer on admission according to Wagner's classification in group A and group B

| Grade | Group A<br>(n=229) | Group B<br>(n=109) | P value <sup>a</sup> |
|-------|--------------------|--------------------|----------------------|
| 1     | 70 (30.6)          | 35 (32.1)          | 0.781                |
| 2     | 66 (28.8)          | 26 (23.9)          | 0.345                |
| 3     | 41 (17.9)          | 20 (18.3)          | 0.929                |
| 4     | 43 (18.8)          | 21 (19.3)          | 0.913                |
| 5     | 9 (3.9)            | 7 (6.4)            | 0.311                |

Values are presented as number (%).

<sup>a</sup>Chi-square test for the comparison of two proportions (stage, %) between group A and B.
